# Supplementary material
Source: PubMed Central journal article supplement (PMC9754050)
Supplement: CJAS_A_1981834_SM4546.pdf [file CJAS_A_1981834_SM4546.pdf]

## Supplemental Materials

### Proof of Proposition 1

*Proof.* Let us write  $X$  as  $X = \operatorname{sech}T$  where  $T \sim W(\alpha, \beta)$ , the cdf of  $X$  can be determined as

$$\begin{aligned} F(x, \alpha, \beta) &= P(X \leq x) = P(\operatorname{sech}T \leq x) = P(\operatorname{arcsech}x \leq T \leq \infty) = 1 - \left[1 - e^{-\alpha(\operatorname{arcsech}x)^\beta}\right] \\ &= e^{-\alpha(\operatorname{arcsech}x)^\beta}. \end{aligned}$$

Note that the hyperbolic secant function is a decreasing function on  $(0, \infty)$ . The associated pdf follows by differentiating  $F(x, \alpha, \beta)$  with respect to  $x$  and using  $\partial(\operatorname{arcsech}x)/\partial x = -(x\sqrt{1-x^2})^{-1}$ . Hence, the proof is completed.  $\square$

### Proof of Proposition 2

*Proof.* The ASHW distribution is identifiable once  $F(x, \alpha_1, \beta_1) = F(x, \alpha_2, \beta_2)$  is valid if and only if  $\alpha_1 = \alpha_2$  and  $\beta_1 = \beta_2$ . After some developments, we get

$$\begin{aligned} F(x, \alpha_1, \beta_1) = F(x, \alpha_2, \beta_2) &\Leftrightarrow e^{-\alpha_1(\operatorname{arcsech}x)^{\beta_1}} = e^{-\alpha_2(\operatorname{arcsech}x)^{\beta_2}} \\ \Leftrightarrow \alpha_1(\operatorname{arcsech}x)^{\beta_1} = \alpha_2(\operatorname{arcsech}x)^{\beta_2} &\Leftrightarrow \frac{\alpha_1}{\alpha_2}(\operatorname{arcsech}x)^{\beta_1 - \beta_2} = 1 \\ \Leftrightarrow \log\left(\frac{\alpha_1}{\alpha_2}\right) + (\beta_1 - \beta_2)\log(\operatorname{arcsech}x) &= 0. \end{aligned}$$

This equality is satisfied for any  $x$  if and only the term varying is  $x$  is not present, so  $\beta_1 = \beta_2$ , and this also implies that  $\log(\alpha_1/\alpha_2) = 0$ , so  $\alpha_1 = \alpha_2$ . It is concluded that the model is identifiable.  $\square$

### Proof of Proposition 3

*Proof.* Let us investigate the proof of the two items, in turn.

- From Equation (1), we have

$$\frac{\partial}{\partial \alpha} F(x, \alpha, \beta) = F'_\alpha(x, \alpha, \beta) = -(\operatorname{arcsech}x)^\beta e^{-\alpha(\operatorname{arcsech}x)^\beta} < 0.$$

Hence,  $F(x, \alpha, \beta)$  is decreasing with respect to the parameter  $\alpha$ . Moreover, we have

$$\frac{\partial^2}{\partial \alpha^2} F(x, \alpha, \beta) = (\operatorname{arcsech}x)^{2\beta} e^{-\alpha(\operatorname{arcsech}x)^\beta} > 0,$$

proving the convexity of  $F(x, \alpha, \beta)$  with respect to the parameter  $\alpha$ .

- Similarly, we have

$$\frac{\partial}{\partial \beta} F(x, \alpha, \beta) = F'_\beta(x, \alpha, \beta) = -\alpha(\operatorname{arcsech}x)^\beta \log(\operatorname{arcsech}x) e^{-\alpha(\operatorname{arcsech}x)^\beta}.$$

It is clear that the  $\log(\operatorname{arcsech}x)$  term determines the sign of above Equation, and  $\log(\operatorname{arcsech}x)$  is positive if  $x \in (0, 2e/(e^2 + 1))$ , and negative if  $x \in (2e/(e^2 + 1), 1)$ . Hence, it can be concluded that  $F(x, \alpha, \beta)$  is decreasing with respect to  $\beta$  if  $x \in (0, 2e/(e^2 + 1))$ , and increasing with respect to  $\beta$  if  $x \in (2e/(e^2 + 1), 1)$ .

Proposition 3 is proved.  $\square$

## Proof of Proposition 4

*Proof.* After simplifications, owing to Equation (2), we arrive at

$$q(x, \alpha_1, \alpha_2, \beta) = \frac{\alpha_1}{\alpha_2} e^{(\alpha_2 - \alpha_1)(\operatorname{arcsech} x)^\beta}.$$

Hence

$$\frac{\partial}{\partial x} q(x, \alpha_1, \alpha_2, \beta) = -\beta \frac{\alpha_1}{\alpha_2} (\alpha_2 - \alpha_1) \left( x \sqrt{1 - x^2} \right)^{-1} (\operatorname{arcsech} x)^{\beta-1} e^{(\alpha_2 - \alpha_1)(\operatorname{arcsech} x)^\beta}.$$

Since  $\alpha_2 - \alpha_1 \geq 0$ , the above derivative function is negative, implying that  $q(x, \alpha_1, \alpha_2, \beta)$  is decreasing. This finishes the proof of Proposition 4.  $\square$

## Proof of Proposition 5

*Proof.* The inequality is clear for  $x \notin (0, 1)$ . For  $x \in (0, 1)$ , let us notice that

$$\operatorname{arcsech} x = \log \left[ \left( 1 + \sqrt{1 - x^2} \right) / x \right] = -\log x + \log \left( 1 + \sqrt{1 - x^2} \right) \geq -\log x.$$

Therefore,  $\alpha (\operatorname{arcsech} x)^\beta \geq \alpha (-\log x)^\beta$ , which implies that

$$F(x, \alpha, \beta) = e^{-\alpha (\operatorname{arcsech} x)^\beta} \leq e^{-\alpha (-\log x)^\beta} = F_*(x, \alpha, \beta).$$

This terminates the proof of Proposition 5.  $\square$

## Proof of Proposition 6

*Proof.* We can write  $X = \operatorname{sech} T$  where  $T \sim W(\alpha, \beta)$ . Therefore, owing to the general binomial theorem with  $e^{-2T} \in (0, 1)$  almost surely, we obtain

$$X^r = (\operatorname{sech} T)^r = 2^r \frac{e^{-rT}}{(1 + e^{-2T})^r} = 2^r \sum_{k=0}^{+\infty} \binom{-r}{k} e^{-(r+2k)T}.$$

Hence, by the Fubini-Tonelli theorem, we get

$$m_r = E(X^r) = 2^r \sum_{k=0}^{+\infty} \binom{-r}{k} E(e^{-(r+2k)T}).$$

Now, by the exponential series, Fubini-Tonelli theorem and the definition of the Weibull distribution, we get

$$E(e^{-(r+2k)T}) = \sum_{\ell=0}^{+\infty} \frac{(-1)^\ell}{\ell!} (r+2k)^\ell E(T^\ell) = \sum_{\ell=0}^{+\infty} \frac{(-1)^\ell}{\ell!} (r+2k)^\ell \alpha^{-\ell/\beta} \Gamma\left(\frac{\ell}{\beta} + 1\right).$$

The desired result is obtained by putting all the above equalities together. This concludes the proof of Proposition 6.  $\square$

## Proof of Proposition 7

*Proof.* By expressing  $Y_t$  as  $Y_t = \operatorname{sech} T$  if  $\{\operatorname{sech} T \leq t\} = \{T \geq \operatorname{arcsech} t\}$  and 0 otherwise, we get

$$m_r(t) = 2^r \sum_{k=0}^{+\infty} \binom{-r}{k} E[e^{-(r+2k)T} I(T \geq \operatorname{arcsech} t)],$$

where  $I(T \geq \operatorname{arcsech} t) = 1$  if the event  $\{T \geq \operatorname{arcsech} t\}$  is realized, and 0 otherwise. We conclude by noticing that

$$\begin{aligned} E[e^{-(r+2k)T} I(T \geq \operatorname{arcsech} t)] &= \sum_{\ell=0}^{+\infty} \frac{(-1)^\ell}{\ell!} (r+2k)^\ell E[T^\ell I(T \geq \operatorname{arcsech} t)] \\ &= \sum_{\ell=0}^{+\infty} \frac{(-1)^\ell}{\ell!} (r+2k)^\ell \alpha^{-\ell/\beta} \Gamma\left(\frac{\ell}{\beta} + 1, \alpha(\operatorname{arcsech} t)^\beta\right). \end{aligned}$$

The proof of Proposition 7 is completed.  $\square$

## Proof of Proposition 8

*Proof.* The binomial formula gives

$$\begin{aligned} m_{s,(j)}^* &= \int_{-\infty}^{+\infty} x^s f_{X_{(j)}}(x, \alpha, \beta) dx \\ &= c_{i,n} \sum_{k=0}^{n-j} \binom{n-j}{k} (-1)^k \int_0^1 x^s f(x, \alpha, \beta) F(x, \alpha, \beta)^{k+j-1} dx. \end{aligned}$$

Now, we can remark

$$\begin{aligned} f(x, \alpha, \beta) F(x, \alpha, \beta)^{k+j-1} &= \frac{\alpha\beta}{x\sqrt{1-x^2}} (\operatorname{arcsech} x)^{\beta-1} e^{-\alpha(j+k)(\operatorname{arcsech} x)^\beta} \\ &= \frac{1}{k+j} f(x, \alpha(k+j), \beta). \end{aligned}$$

Therefore

$$m_{s,(j)}^* = c_{i,n} \sum_{k=0}^{n-j} \binom{n-j}{k} (-1)^k \frac{1}{k+j} \int_0^1 x^s f(x, \alpha(k+j), \beta) dx = \sum_{k=0}^{n-j} v_{j,k} m_{j,k,s}^\dagger.$$

This concludes the proof of Proposition 8.  $\square$

## Proof of Proposition 9

*Proof.* By using some basics concepts in probability theory and the expressions of  $F(x, \alpha_2, \beta)$  and  $f(x, \alpha_1, \beta)$  in Equations (1) and (2), respectively, we get

$$\begin{aligned} \tau &= \int_{-\infty}^{+\infty} F(x, \alpha_2, \beta) f(x, \alpha_1, \beta) dx \\ &= \int_0^1 e^{-\alpha_2(\operatorname{arcsech} x)^\beta} \frac{\alpha_1\beta}{x\sqrt{1-x^2}} (\operatorname{arcsech} x)^{\beta-1} e^{-\alpha_1(\operatorname{arcsech} x)^\beta} dx. \end{aligned}$$

A rearrangement of the integral with the use of the integral property of the pdf of the  $ASHW(\alpha_1 + \alpha_2, \beta)$  distribution give

$$\begin{aligned} \tau &= \frac{\alpha_1}{\alpha_1 + \alpha_2} \int_0^1 \frac{\beta(\alpha_1 + \alpha_2)}{x\sqrt{1-x^2}} (\operatorname{arcsech} x)^{\beta-1} e^{-(\alpha_1 + \alpha_2)(\operatorname{arcsech} x)^\beta} dx \\ &= \frac{\alpha_1}{\alpha_1 + \alpha_2} \int_{-\infty}^{+\infty} f(x, \alpha_1 + \alpha_2, \beta) dx = \frac{\alpha_1}{\alpha_1 + \alpha_2}. \end{aligned}$$

Proposition 9 is proved.  $\square$

# Score functions, observed information matrix and existence of the MLEs

In theory, MLEs of the  $\alpha$  and  $\beta$  parameters follow by solving

$$\frac{\partial \ell(\mathbf{\Lambda})}{\partial \alpha} = \frac{n}{\alpha} - \sum_{i=1}^n (\operatorname{arcsech} x_i)^\beta = 0$$

and

$$\frac{\partial \ell(\mathbf{\Lambda})}{\partial \beta} = \frac{n}{\beta} + \sum_{i=1}^n \operatorname{arcsech} x_i - \alpha \sum_{i=1}^n (\operatorname{arcsech} x_i)^\beta \log(\operatorname{arcsech} x_i) = 0.$$

From score function belong to  $\alpha$  parameter, the desired solution satisfied

$$\alpha = \frac{n}{\sum_{i=1}^n (\operatorname{arcsech} x_i)^\beta}.$$

Then, by combining above equation and log-likelihood function, the following PLL function can be derived:

$$\ell(\beta) = n \log \left( \frac{n}{\sum_{i=1}^n (\operatorname{arcsech} x_i)^\beta} \right) + n \log \beta - \sum_{i=1}^n \log \left[ x_i \sqrt{1 - x_i^2} \right] + (\beta - 1) \sum_{i=1}^n \operatorname{arcsech} x_i - n.$$

Going on the parameter estimation of the parameter  $\beta$  based on its PLL function, we have

$$\frac{\partial \ell(\beta)}{\partial \beta} = \frac{n}{\beta} - n \frac{\sum_{i=1}^n (\operatorname{arcsech} x_i)^\beta \log(\operatorname{arcsech} x_i)}{\sum_{i=1}^n (\operatorname{arcsech} x_i)^\beta} + \sum_{i=1}^n \operatorname{arcsech} x_i.$$

Under mild regularity conditions, The MLEs have the bivariate normal distribution with mean  $\mu = (\alpha, \beta)$  and covariance matrix  $I^{-1}$ , where  $I$  denotes the following  $2 \times 2$  observed information matrix:

$$I = - \begin{pmatrix} \frac{\partial^2}{\partial \alpha^2} \ell(\mathbf{\Lambda}) & \frac{\partial^2}{\partial \alpha \partial \beta} \ell(\mathbf{\Lambda}) \\ \frac{\partial^2}{\partial \alpha \partial \beta} \ell(\mathbf{\Lambda}) & \frac{\partial^2}{\partial \beta^2} \ell(\mathbf{\Lambda}) \end{pmatrix} \Bigg|_{\mathbf{\Lambda}=(\hat{\alpha}, \hat{\beta})},$$

The components of  $I$  can be derived through the following derivatives formula:

$$\begin{aligned} \frac{\partial^2}{\partial \alpha^2} \ell(\mathbf{\Lambda}) &= -\frac{n}{\alpha^2}, \\ \frac{\partial^2}{\partial \alpha \partial \beta} \ell(\mathbf{\Lambda}) &= \frac{\partial^2}{\partial \beta \partial \alpha} \ell(\mathbf{\Lambda}) = -\sum_{i=1}^n (\operatorname{arcsech} x_i)^\beta \log(\operatorname{arcsech} x_i) \end{aligned}$$

and

$$\frac{\partial^2}{\partial \beta^2} \ell(\mathbf{\Lambda}) = -\frac{n}{\beta^2} - \alpha \sum_{i=1}^n (\operatorname{arcsech} x_i)^\beta \log^2(\operatorname{arcsech} x_i).$$

Now, we discuss the uniqueness and existence of the MLEs. Using the above second derivative of the parameter  $\alpha$ , it can be seen clearly that since for all  $\alpha > 0$  and  $n$ ,  $\partial^2 \ell(\mathbf{\Lambda}) / \partial \alpha^2 < 0$ . This inequality indicates that the  $\partial \ell(\mathbf{\Lambda}) / \partial \alpha$  is strictly decreasing in  $\alpha$ . Furthermore,  $\lim_{\alpha \rightarrow 0} \partial \ell(\mathbf{\Lambda}) / \partial \alpha = +\infty$  and  $\lim_{\alpha \rightarrow +\infty} \partial \ell(\mathbf{\Lambda}) / \partial \alpha = -\sum_{i=1}^n (\operatorname{arcsech} x_i)^\beta < 0$ . Then it is also concluded that  $\hat{\alpha}$  exists and is unique when parameter  $\beta$  is given or known.

On the other hand, using the above second derivative of the parameter  $\beta$ , it can be seen that  $\partial^2 \ell(\mathbf{\Lambda}) / \partial \beta^2 < 0$  and this inequality indicates that the  $\partial \ell(\mathbf{\Lambda}) / \partial \beta$  is strictly decreasing in  $\beta$ . Furthermore,  $\lim_{\beta \rightarrow 0} \partial \ell(\mathbf{\Lambda}) / \partial \beta = +\infty$  and  $\lim_{\beta \rightarrow +\infty} \partial \ell(\mathbf{\Lambda}) / \partial \beta = -\infty$ . Then it is concluded that  $\hat{\beta}$  exists and is unique when parameter  $\alpha$  is given or known.

## The competing distributions for univariate data modeling

- Beta distribution:

$$f_{Beta}(x, \alpha, \beta) = \frac{1}{B(\alpha, \beta)} (1-x)^{\beta-1} x^{\alpha-1}, \quad x \in (0, 1),$$

and  $f_{Beta}(x, \alpha, \beta) = 0$  for  $x \notin (0, 1)$ , where  $\alpha > 0$ ,  $\beta > 0$ , and  $B(\alpha, \beta)$  is the standard beta function.

- Kw distribution:

$$f_{Kw}(x, \alpha, \beta) = \alpha\beta (1-x^\alpha)^{\beta-1} x^{\alpha-1}, \quad x \in (0, 1),$$

and  $f_{Kw}(x, \alpha, \beta) = 0$  for  $x \notin (0, 1)$ , where  $\alpha > 0$  and  $\beta > 0$ .

- Johnson  $S_B$  distribution:

$$f_{S_B}(x, \alpha, \beta) = \frac{\beta}{x(1-x)} \phi \left[ \beta \log \left( \frac{x}{1-x} \right) + \alpha \right], \quad x \in (0, 1),$$

and  $f_{S_B}(x, \alpha, \beta) = 0$  for  $x \notin (0, 1)$ , where  $\alpha \in \mathbb{R}$ ,  $\beta > 0$ , and  $\phi(x)$  is the pdf of the standard normal distribution.

- UG distribution:

$$f_{UG}(x, \alpha, \beta) = \alpha\beta x^{-\beta-1} e^{-\alpha(x^{-\beta}-1)}, \quad x \in (0, 1),$$

and  $f_{UG}(x, \alpha, \beta) = 0$  for  $x \notin (0, 1)$ , where  $\alpha > 0$  and  $\beta > 0$ .

## Score vector components of the proposed regression model for MLE method

The derivatives of the Equation (17) with respect to model parameters  $\beta$  and  $\delta$  are given by

$$\frac{\partial \ell(\Delta)}{\partial \beta} = \frac{n}{\beta} - \sum_{i=1}^n \log(\operatorname{arcsech} \mu_i) + \sum_{i=1}^n \log(\operatorname{arcsech} y_i) + \log u \sum_{i=1}^n \left( \frac{\operatorname{arcsech} y_i}{\operatorname{arcsech} \mu_i} \right)^\beta \log \left( \frac{\operatorname{arcsech} y_i}{\operatorname{arcsech} \mu_i} \right)$$

and

$$\frac{\partial \ell(\Delta)}{\partial \delta_k} = -\beta \sum_{i=1}^n \frac{\partial \operatorname{arcsech} \mu_i / \partial \delta_k}{\operatorname{arcsech} \mu_i} - \beta \log u \sum_{i=1}^n (\operatorname{arcsech} y_i)^\beta (\operatorname{arcsech} \mu_i)^{-\beta-1} \frac{\partial \operatorname{arcsech} \mu_i}{\partial \delta_k},$$

where

$$\begin{aligned} \frac{\partial \operatorname{arcsech} \mu_i}{\partial \delta_k} &= - \left( \frac{e^{\mathbf{x}_i \delta^T}}{1 + e^{\mathbf{x}_i \delta^T}} \sqrt{1 - \frac{e^{2\mathbf{x}_i \delta^T}}{(1 + e^{\mathbf{x}_i \delta^T})^2}} \right)^{-1} \frac{x_{ik} e^{\mathbf{x}_i \delta^T}}{(1 + e^{\mathbf{x}_i \delta^T})^2} \\ &= - \frac{x_{ik}}{\sqrt{1 + 2e^{\mathbf{x}_i \delta^T}}} = -x_{ik} \left( \frac{1 + \mu_i}{1 - \mu_i} \right)^{-1/2}. \end{aligned}$$

Since above Equations consist of the nonlinear function according to model parameters, these log-likelihood functions can be maximized directly by the software such as R and Matlab.

## The competing distributions for regression modeling

- The pdf of the beta regression model is given as

$$f_{Beta}(y, \beta, \mu) = \frac{\Gamma(\beta)}{\Gamma(\beta\mu)\Gamma((1-\mu)\beta)} y^{\beta\mu-1} (1-y)^{(1-\mu)\beta-1}, \quad y \in (0, 1),$$

$f_{Beta}(y, \beta, \mu) = 0$  for  $y \notin (0, 1)$ , where  $\mu \in (0, 1)$  and  $\beta > 0$ ,

- The pdf of the Kw model is specified by

$$f_{Kw}(y, \beta, \mu) = \frac{\beta \log(0.5)}{\log(1 - \mu^\beta)} y^{\beta-1} (1 - y^\beta)^{\log(0.5)/(\beta(1-\mu)-1)}, \quad y \in (0, 1),$$

$$f_{Kw}(y, \beta, \mu) = 0 \text{ for } y \notin (0, 1), \text{ where } \mu \in (0, 1) \text{ and } \beta > 0,$$

- The pdf of the LEEG model is given as

$$f_{LEEG}(y, \beta, \mu) = \frac{\beta \mu^\beta (1 - \mu^\beta) y^{\beta-1}}{(\mu^\beta + (1 - 2\mu^\beta) y^\beta)^2}, \quad y \in (0, 1),$$

$$f_{LEEG}(y, \beta, \mu) = 0 \text{ for } y \notin (0, 1), \text{ where } \mu \in (0, 1) \text{ and } \beta > 0.$$
